# Supplementary material for: Durability and Strength Improvement of Ambient-Cured Geopolymer Concrete using Polypropylene Fibers
Source: Research Square preprint supplement (doi:10.21203/rs.3.rs-6778704/v1), 2025-06-06
Supplement: Supplementary file 1 [file 5801a707a37c7bfd35503f36.docx]

Supplementary Table **1**: Concrete mix designs (1 m3)

|  |  |  |  | **Ref** | **0** | **0.5** | **1** | **1.5** |
| --- | --- | --- | --- | --- | --- | --- | --- | --- |
| **Raw Material** | **Material Source** | **RD** |  | **Unit** | Qty | Qty | Qty | Qty |
| Water | Municipal | 1 |  | kg | 180 | 180 | 180 | 180 |
| Slag | Granulated Blast furnace Slag (GGBS) | 3.14 |  | kg | 360 | 360 | 360 | 360 |
| Fly ash | Fly ash (Class F) | 1.9 |  | Kg | 90 | 90 | 90 | 90 |
| 20mm Stone | Granite Stone ex Elsana | 2.74 |  | kg | 975 | 975 | 975 | 975 |
| Dune Sand | Atlantic Sands | 2.63 |  | kg | 469.41 | 469.41 | 469.41 | 469.41 |
| Crusher Dust | Hornefels Tygerberg | 2.76 |  | kg | 326.03 | 326.03 | 326.03 | 326.03 |
| Hardener | Sodium hydroxide | 1 |  | kg | 0.48 | 0.48 | 0.48 | 0.48 |
| 40mm SIKA Fibre(polypropylene) | SIKA | 1 |  | kg | 0 | 2.25 | 3.35 | 5 |

Supplementary Table **2**: Compressive Strength of Geopolymer Concrete at Various Fiber Content Levels

| **Fiber Content %** | **Compressive strength (MPa)** | | |
| --- | --- | --- | --- |
| 7 Day | 28 Day | 90 Day |
| 0% | 30.11 | 37.69 | 47.59 |
| 30.13 | 41.06 | 49.90 |
| 29.76 | 42.44 | 41.25 |
| **Average** | **30.00** | **40.40** | **46.25** |
| 0.50% | 26.61 | 38.33 | 47.87 |
| 29.22 | 40.26 | 47.30 |
| 30.62 | 41.55 | 47.10 |
| **Average** | **28.61** | **39.66** | **47.14** |
| 1.00% | 25.16 | 37.02 | 42.06 |
| 28.17 | 39.20 | 43.14 |
| 24.17 | 39.94 | 41.44 |
| **Average** | **27.31** | **38.63** | **44.11** |
| 1.50% | 28.17 | 43.63 | 41.87 |
| 28.77 | 39.13 | 42.01 |
| 28.84 | 39.93 | 40.70 |
| **Average** | **28.59** | **40.90** | **41.53** |

Supplementary Table **3**: Flexural Strength of Geopolymer Concrete with Varying Fiber Content Cured at Ambient Temperature for 7, 28, and 90 Days.

| **Fiber Content %** | **Flexural strength (MPa)** | | |
| --- | --- | --- | --- |
| 7 Day | 28 Day | 90 Day |
| 0 | 1.634 | 2.1192 | 2.2531 |
|  | 1.3679 | 2.2549 | 2.2988 |
| **Average** | **1.50095** | **2.18705** | **2.27595** |
|  |  |  |  |
| 0.5 | 1.4978 | 2.2767 | 2.5578 |
|  | 1.8444 | 2.3969 | 2.4782 |
| **Average** | **1.6711** | **2.3368** | **2.518** |
| 1.0% | 1.7352 | 2.7209 | 3.4576 |
|  | 1.6764 | 2.7295 | 3.2419 |
| **Average** | **1.7058** | **2.7252** | **3.34975** |
|  |  |  |  |
| 1.5% | 1.5928 | 2.4996 | 2.789 |
|  | 1.5333 | 2.3543 | 2.834 |
| **Average** | **1.56305** | **2.42695** | **2.8115** |

Supplementary Table **4:** Sorptivity of Geopolymer Concrete at Varying Fiber Contents and Curing Times

| **Fiber Content (%)** | **Time (hours)** | **Mass Gained (g)** | **ΔM (g)** | **t^0.5 (h^0.5)** | **Sorptivity (g/h^0.5)** |
| --- | --- | --- | --- | --- | --- |
| **0%** | 0.5 | 7.912 | 7.912 | 0.707 | 11.19 |
|  | 1 | 9.987 | 2.075 | 1 | 2.08 |
|  | 1.5 | 10.456 | 0.469 | 1.225 | 0.38 |
|  | 2 | 10.92 | 0.464 | 1.414 | 0.33 |
|  | 2.5 | 11.554 | 0.634 | 1.581 | 0.4 |
|  | 3 | 11.793 | 0.239 | 1.732 | 0.14 |
| **0.50%** | 0.5 | 8.312 | 8.312 | 0.707 | 11.75 |
|  | 1 | 10.28 | 1.968 | 1 | 1.97 |
|  | 1.5 | 10.831 | 0.551 | 1.225 | 0.45 |
|  | 2 | 11.39 | 0.559 | 1.414 | 0.39 |
|  | 2.5 | 11.8 | 0.41 | 1.581 | 0.26 |
|  | 3 | 12.1 | 0.3 | 1.732 | 0.17 |
| **1%** | 0.5 | 8.5 | 8.5 | 0.707 | 12.03 |
|  | 1 | 10.5 | 2 | 1 | 2 |
|  | 1.5 | 11 | 0.5 | 1.225 | 0.41 |
|  | 2 | 11.5 | 0.5 | 1.414 | 0.35 |
|  | 2.5 | 12 | 0.5 | 1.581 | 0.32 |
|  | 3 | 12.5 | 0.5 | 1.732 | 0.29 |
| **1.50%** | 0.5 | 8.8 | 8.8 | 0.707 | 12.44 |
|  | 1 | 10.7 | 1.9 | 1 | 1.9 |
|  | 1.5 | 11.3 | 0.6 | 1.225 | 0.49 |
|  | 2 | 11.8 | 0.5 | 1.414 | 0.35 |
|  | 2.5 | 12.3 | 0.5 | 1.581 | 0.32 |
|  | 3 | 12.8 | 0.5 | 1.732 | 0.29 |
